# Supplementary material for: Direct Monitoring of the Strand Passage Reaction of DNA Topoisomerase II Triggers Checkpoint Activation
Source: PLOS journal article supplement (doi:10.1371/journal.pgen.1003832), 2013-10-03
Supplement: S5 (10.1371/journal.pgen.1003832.s005) [file journal.pgen.1003832.s005]

**a**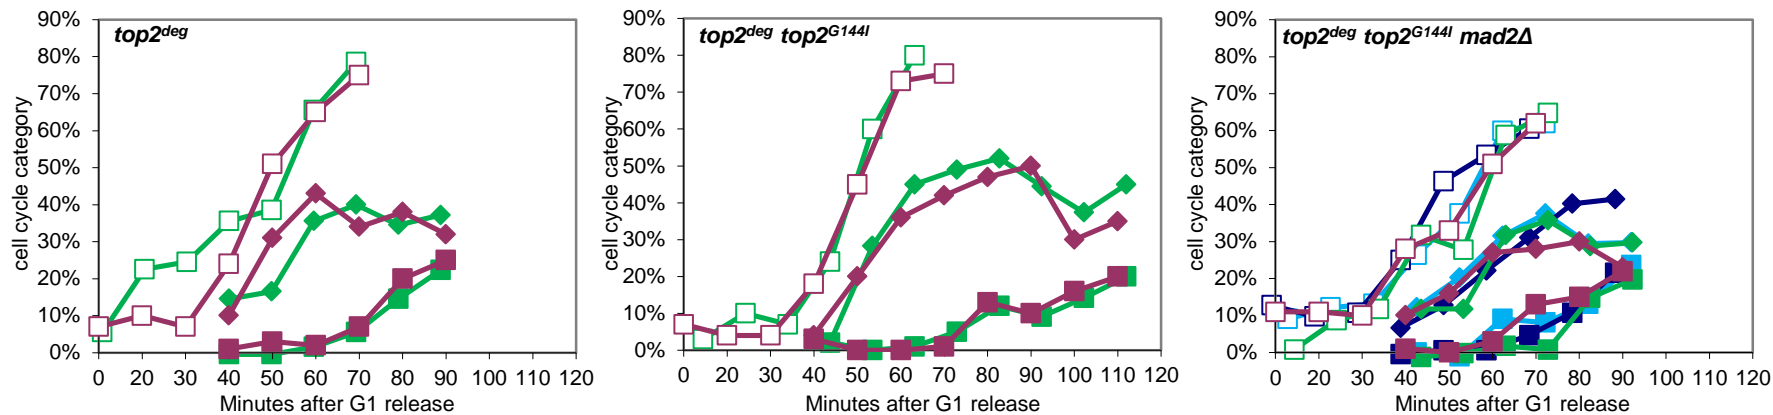**b**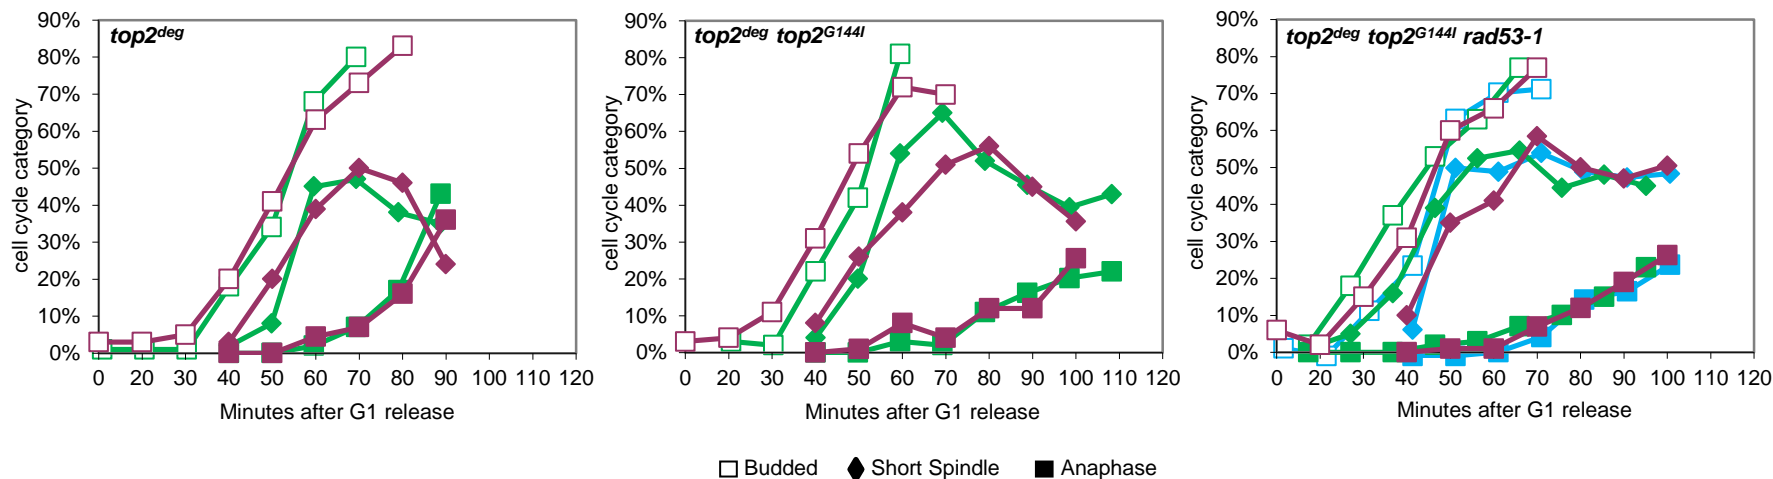

## Figure S5

### Cell Cycle Population Analyses of SPR Mutants: *top2-B44*, *top2*<sup>G144I</sup>

Each yeast strain was synchronized in G1 and Top2<sup>deg</sup> depleted as described in the Material and Methods section. Upon release, samples were taken at 10 minute intervals to score the % cells that had undergone bud emergence (open squares), G2 spindle assembly (diamonds) and anaphase (closed squares). Each analysis was performed a minimum of three times (purple, blue and green plots) and the data aligned based on bud emergence. The G2/M interval (time period between spindle assembly and anaphase) was calculated for each strain as described in the Material and Methods section. **a**, *top2*<sup>G144I</sup> *mad2*Δ versus *top2*<sup>G144I</sup>. **b**, *top2*<sup>G144I</sup> *rad53-1* versus *top2*<sup>G144I</sup>.
